# Supplementary material
Source: MDPI journal article supplement (https://www.mdpi.com/2073-4395/11/9/1770)
Supplement: s1 [file s1 › Supplementary data.xlsx]

## Sheet: Table S1
Table S1. Mean values and standard error (SE) of the soil chemical composition before transplant.
Soil characteristics	Abbreviations	Units	Mean ± SE
pH in water	pHw	-	8.12 ± 0.05
pH in potassium chloride	pHKCl	-	7.6 ± 0.03
Electrical conductivity	E.C.	µS cm-1	213.22 ± 26.73
Total nitrogen content	N	% dm	0.07 ± 0.00
Content in carbonates CaCO3	CaCO3	% dm	27.16 ± 1.25
Organic matter content	O.M.	% dm	1.46 ± 0.22
Carbon:nitrogen ratio	C:N	-	12.50 ± 1.91
Phosphorus content	P	mg kg-1 dm	122.06 ± 10.07
Potassium content	K	mg kg-1 dm	176.06 ± 12.79
Calcium content	Ca2+	meq 100 g-1 dm	159.60 ± 2.09
Magnesium content	Mg2+	meq 100 g-1 dm	4.80 ± 0.12
Iron content	Fe	ppm	5.28 ± 0.12
Zinc content	Zn	ppm	8.99 ± 0.53
Copper content	Cu	ppm	5.92 ± 0.09

## Sheet: Table S2
Table S2. Values of intake water chemical composition.
Water characteristics	Abbreviations	Units
pH	pH	-	7.5
Electrical conductivity	E.C.	µS cm-1	1.6
Nitrates	NO3-	mmol/L	0.6
Ammonium	NH4+	mmol/L	0.06
Phosphates	H2PO4-	mmol/L	0
Sulphates	SO42-	mmol/L	3.75
Calcium	Ca2+	mmol/L	5.42
Magnesium	Mg2+	mmol/L	1.92
Potassium	K	mmol/L	0.15
Carbonates	CO32-	mmol/L	0
Bicarbonates	HCO3-	mmol/L	6
Sodium	Na	mmol/L	3.96
Chlorine	Cl	mmol/L	0.01
